# Supplementary material for: A pH-Responsive Foam Formulated with PAA/Gemini 12-2-12 Complexes
Source: MDPI journal article supplement (doi:10.3390/colloids5030037), 2021-07-19
Supplement: s1 [file s1]

Supplementary Materials.

## A pH-Responsive Foam Formulated with PAA/Gemini 12-2-12 Complexes.

Hernán Martínelli<sup>1</sup>, Claudia Domínguez<sup>1</sup>, Marcos Fernández Leyes<sup>1</sup>, Sergio Moya<sup>2</sup> and Hernán Ritacco<sup>1,\*</sup>

### Additional Results

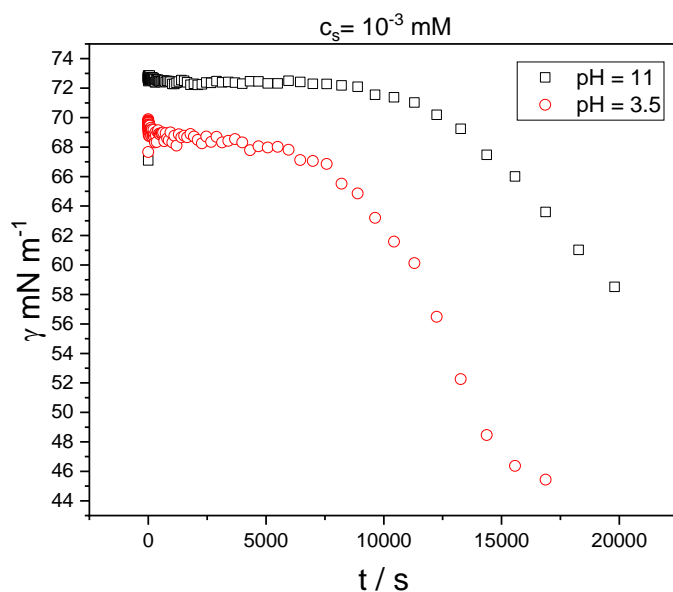

Figure S 1: Dynamic surface tension for PAA/G12,  $c_p = 1 \text{ mg. ml}^{-1}$ ,  $c_s = 10^{-3} \text{ mM}$ .

pH = 3.5 (red circles); pH = 11 (black squares)

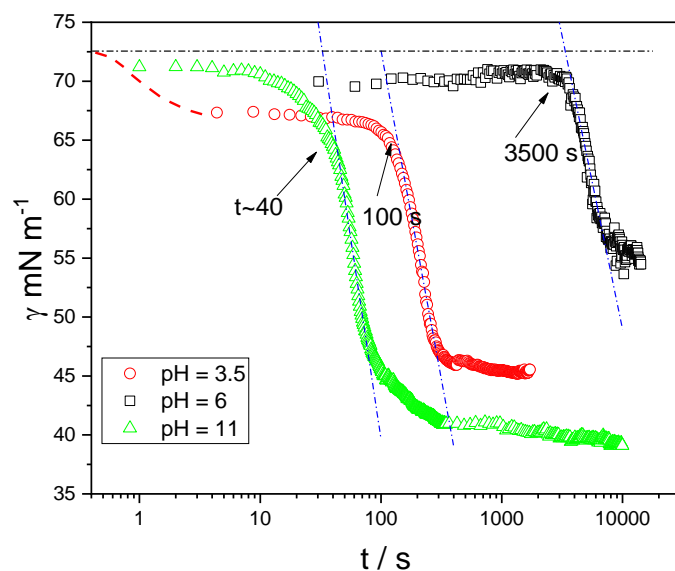

Figure S 2: Dynamic surface tension for PAA/G12,  $c_p = 1 \text{ mg. ml}^{-1}$ ,  $c_s = 4 \times 10^{-2} \text{ mM}$ .

$\text{pH}=3.5$  (red circles);  $\text{pH} = 6$  (black squares);  $\text{pH} = 11$  (green triangles). The lines are fittings with exponentials.

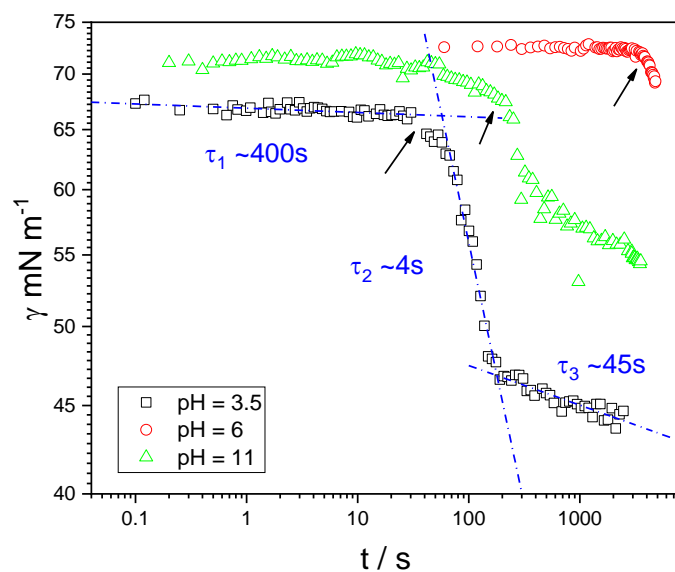

Figure S 3: Dynamic surface tension,  $c_p = 1 \text{ mg. ml}^{-1}$ ,  $c_s = 0.1 \text{ mM}$ .  $\text{pH} = 3.5$  (squares),  $\text{pH} = 6$  (circles), and  $\text{pH} = 11$  (triangles). The arrows indicate the induction time at which the surface tension starts to decrease appreciably. The lines superimposed to the curve at  $\text{pH} = 3.5$  are fittings with exponentials. We identified at least three processes with distinct characteristic times:  $\tau_1 \sim 400\text{s}$ ,  $\tau_2 \sim 4\text{s}$  and  $\tau_3 \sim 45\text{s}$ .

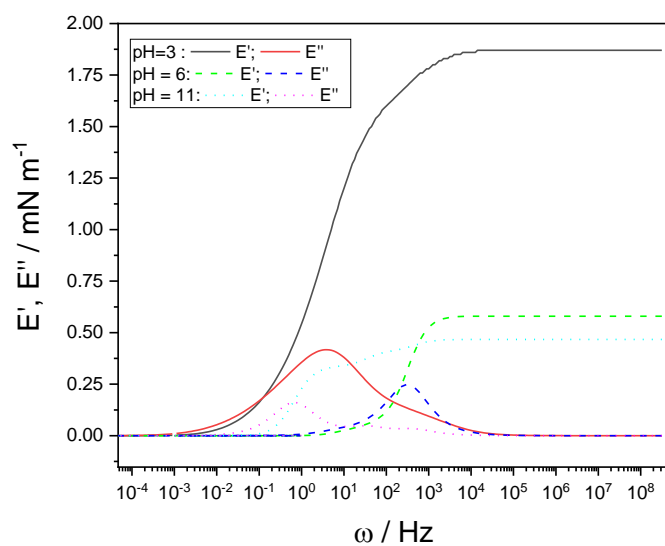

Figure S 4: storage,  $E'$ , and loss,  $E''$ , moduli from step-compression experiments.  $C_p = 1 \text{ mg ml}^{-1}$ ,  $c_s = 0.5 \text{ mM}$

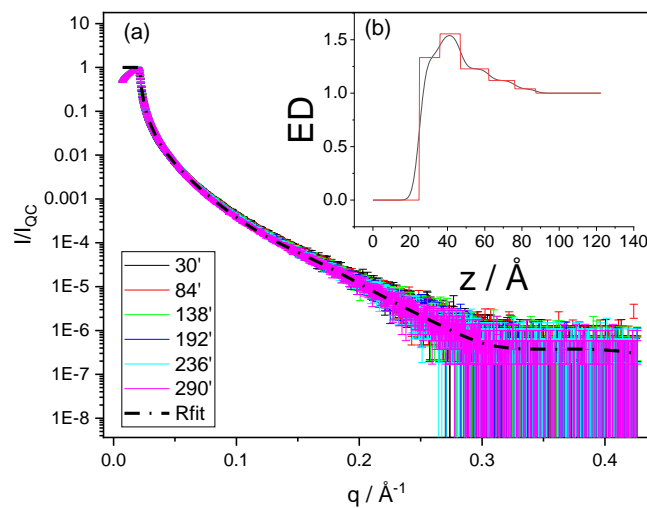

Figure S 5: PAA  $1 \text{ mg ml}^{-1}$  + GI2  $4 \times 10^{-2} \text{ mM}$  at  $\text{pH} = 3.5$ . (a) XRR as a function of time, expressed in min. (b) ED from fitting with StochFit

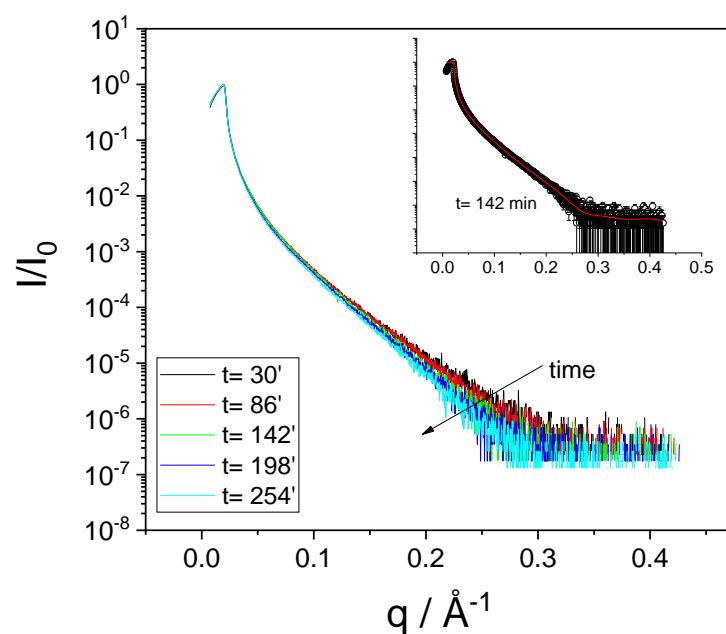

Figure S 6: XRR curves for PAA  $1 \text{ mg ml}^{-1}$  + G12  $10^{-3} \text{ mM}$  at pH 3, as a function of adsorption time. The inset shows a typical model-independent fitting result; in this case, the curve shown corresponds to an adsorption time of 142 min.

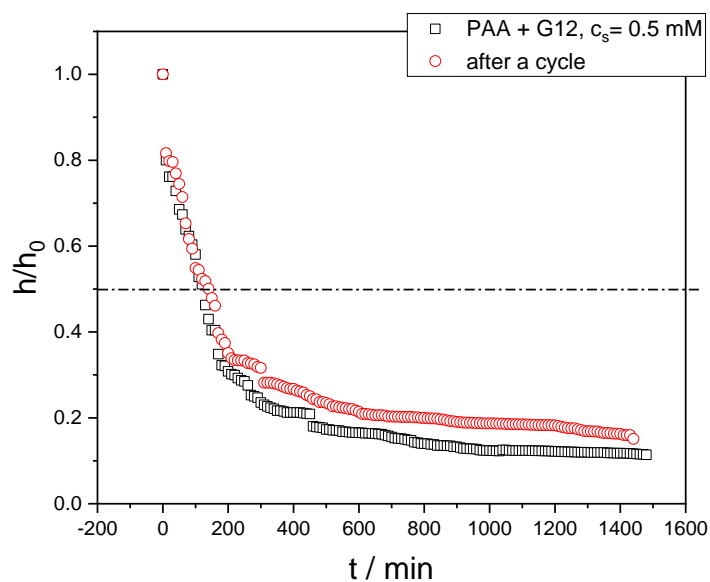

Figure S 7: Relative foam height,  $h/h_0$  ( $h_0$  is the initial foam height) as a function of time for the same sample before and after a NaOH – HCl cycle that takes the pH from 3 to 11 and then goes back to 3.
